# Supplementary material for: A network perspective on metabolic inconsistency
Source: Springer Nature journal article supplement (doi:10.1186/1752-0509-6-41), 2012-01-01

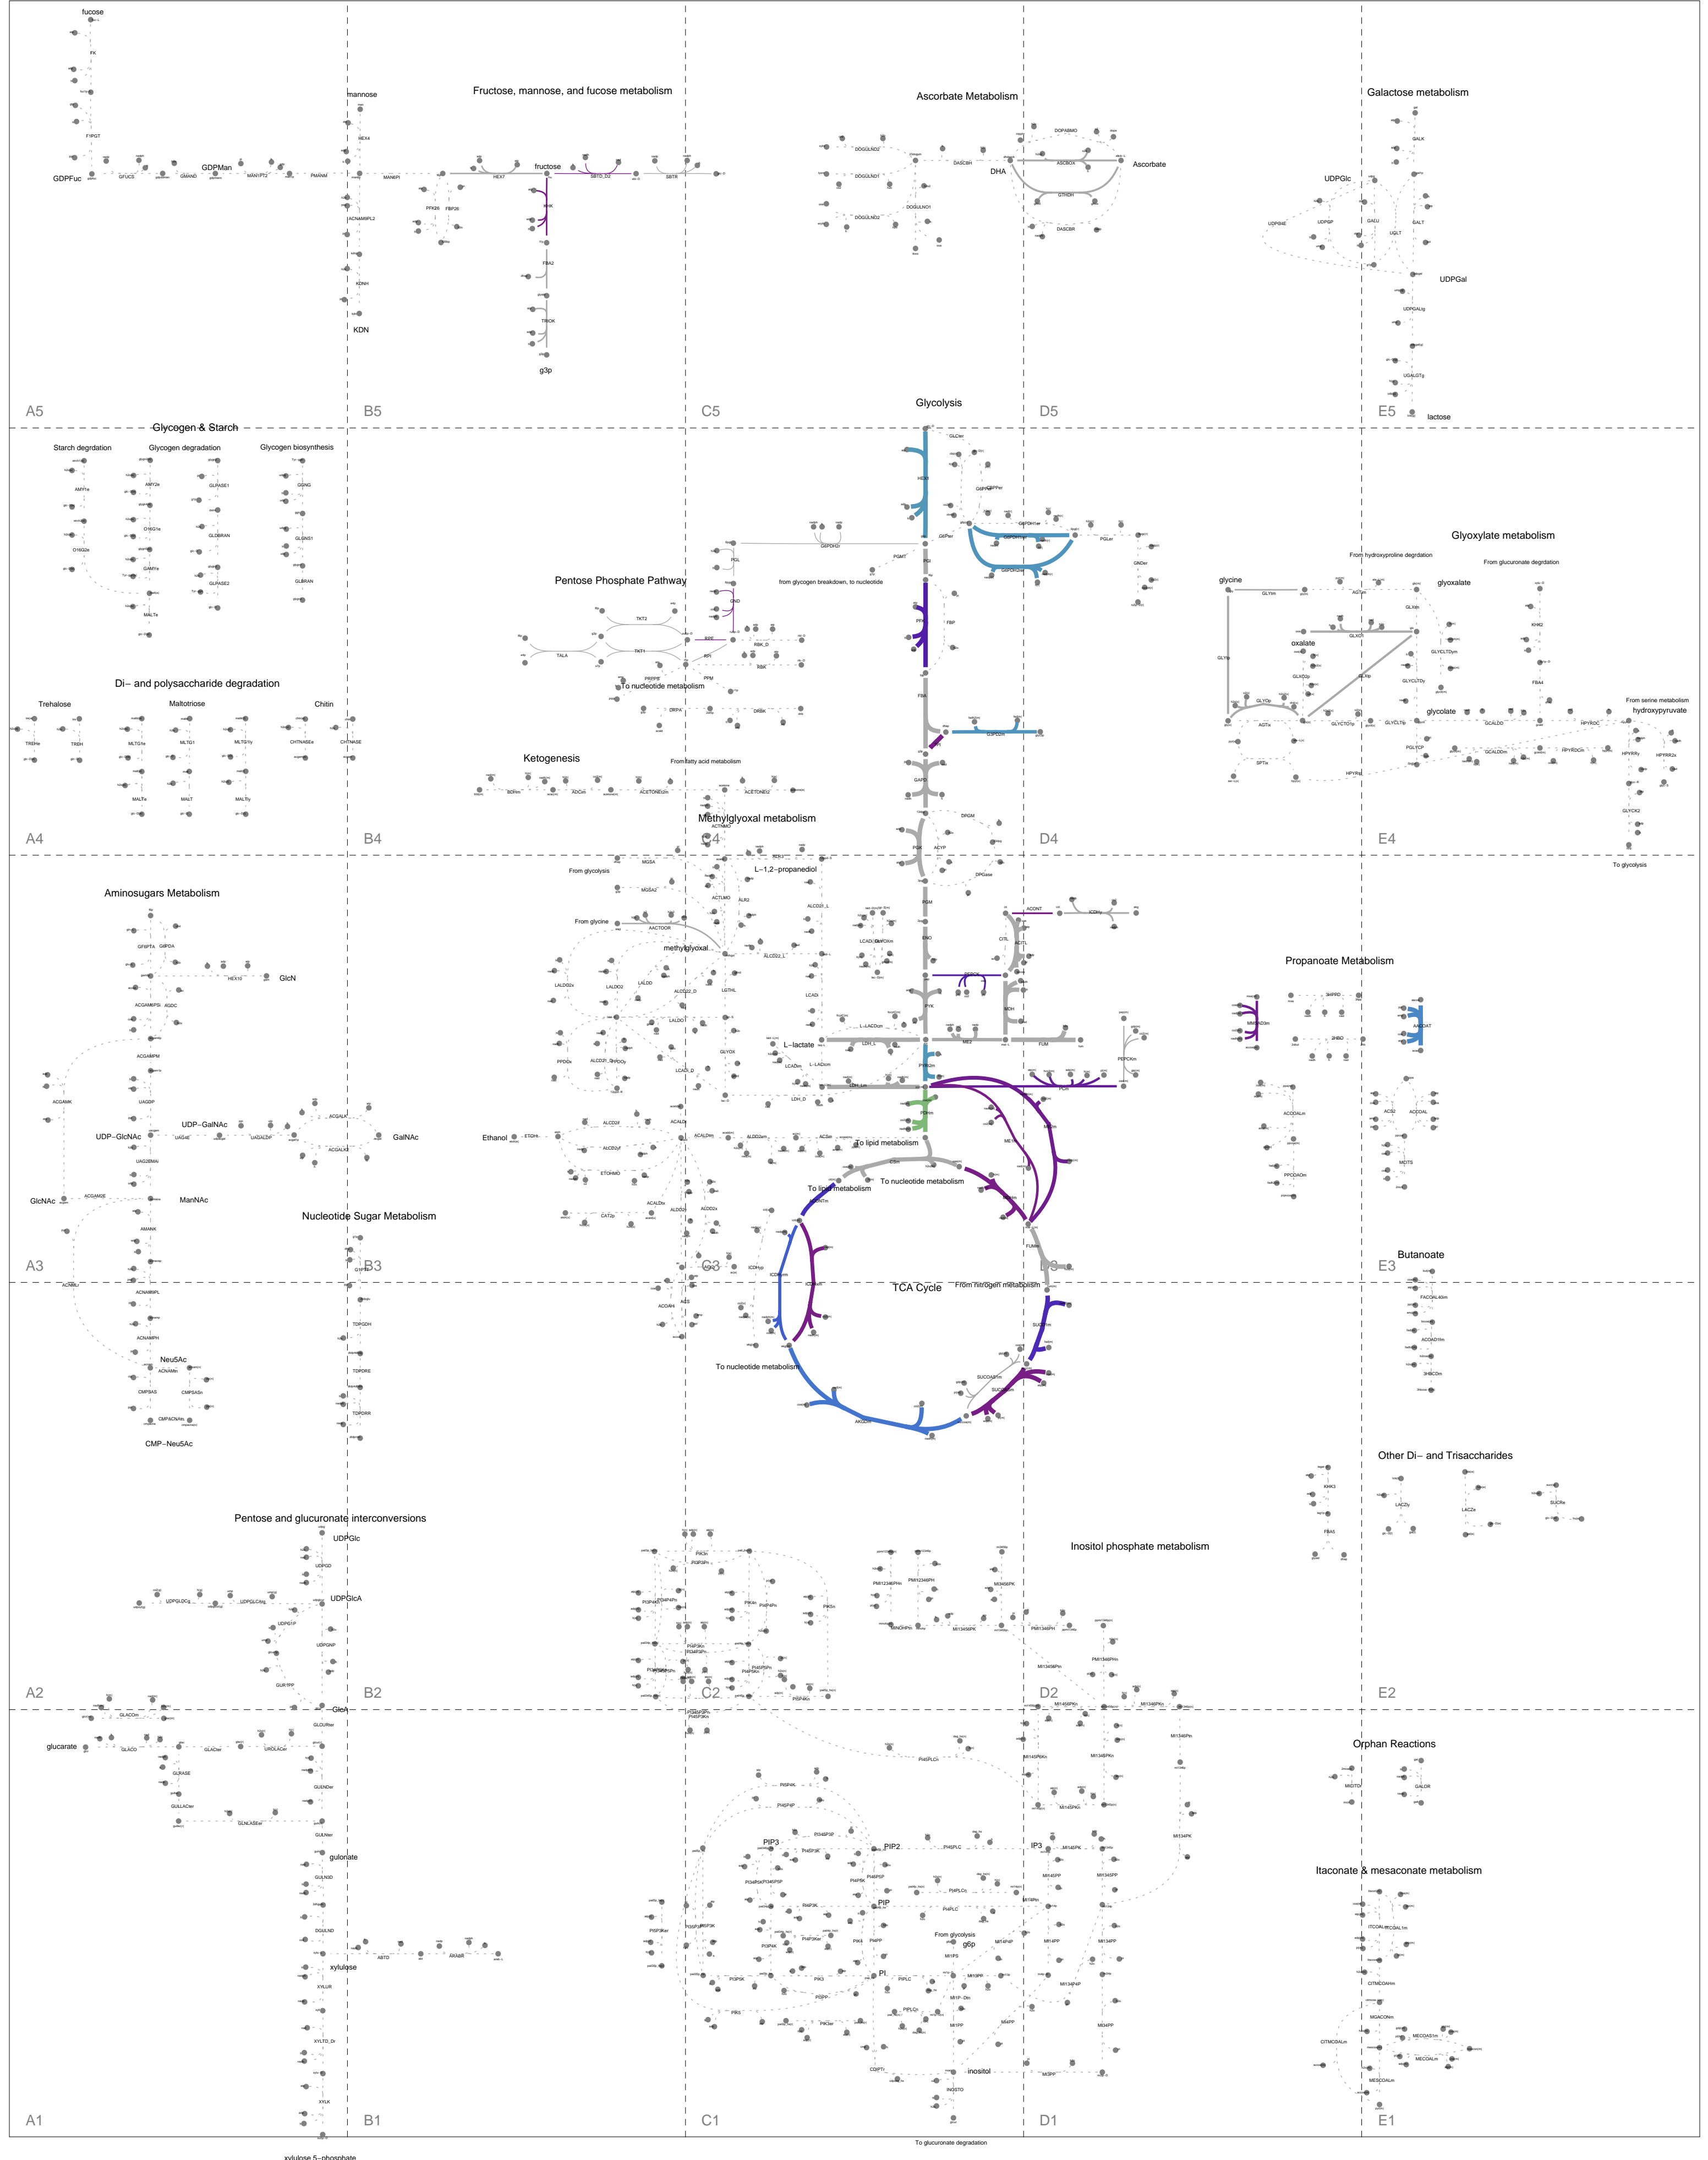

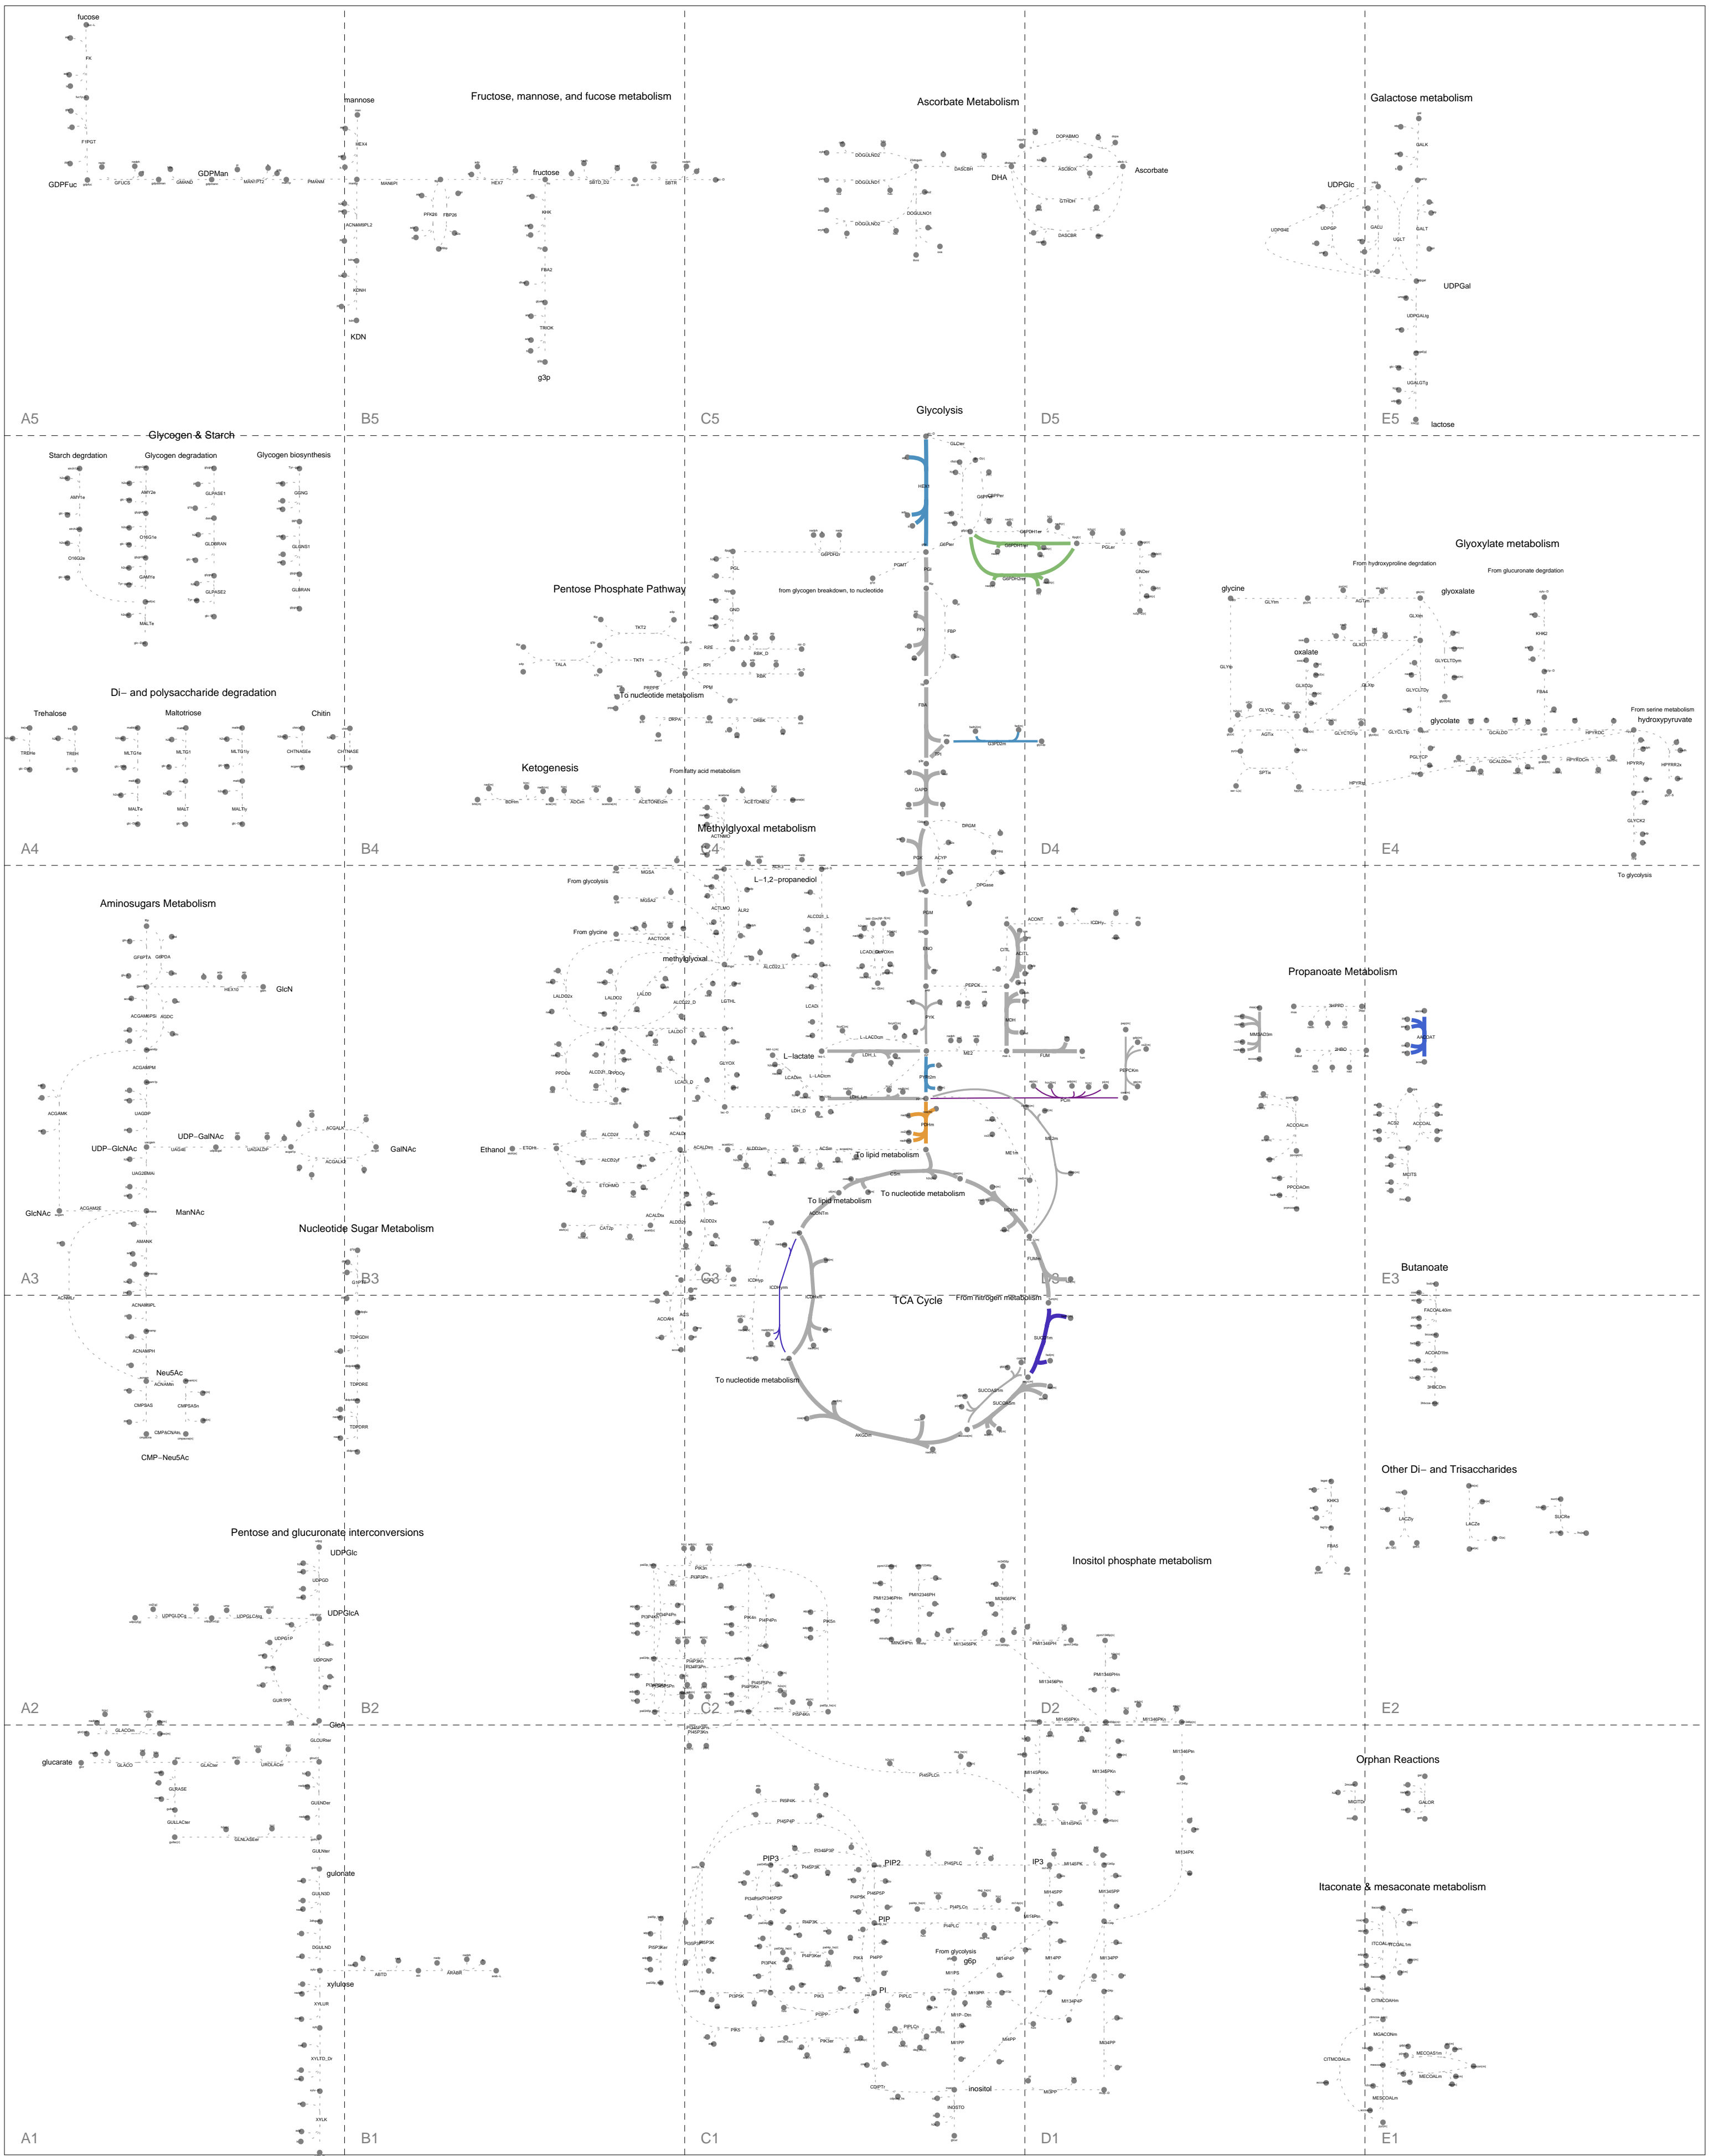

xylulose 5-phosphate

To glucuronate degradation

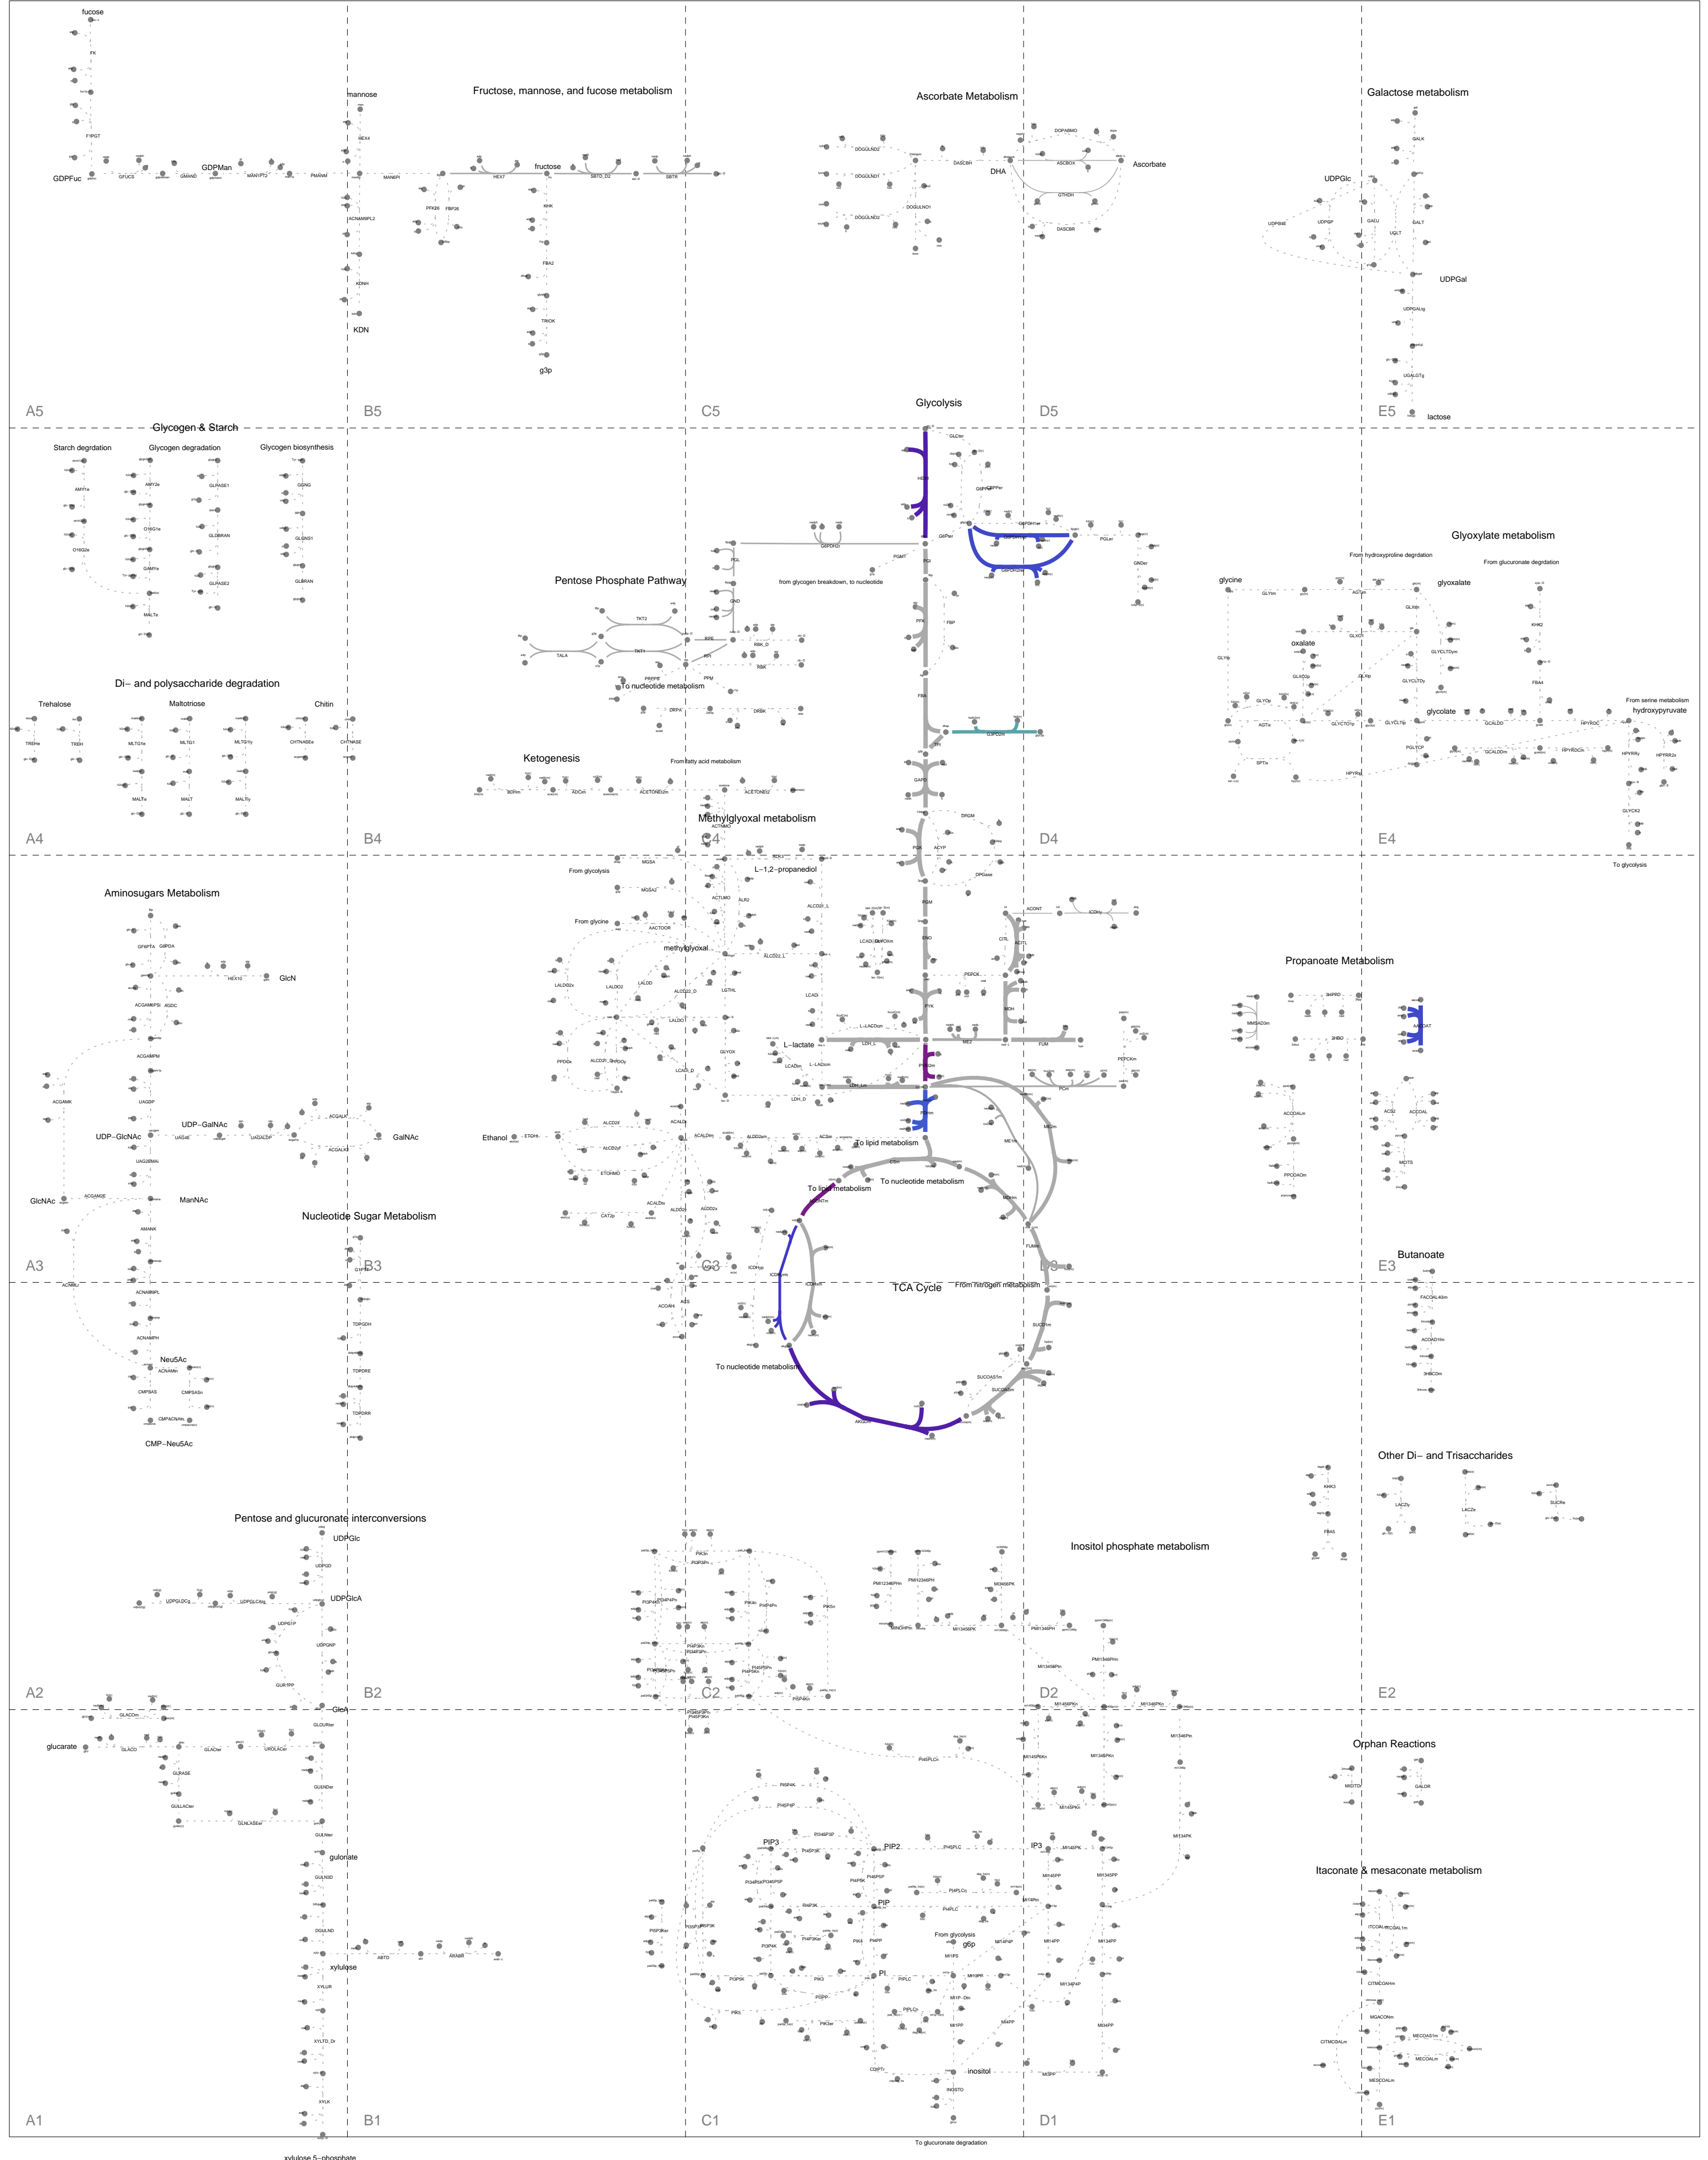

xylose 5-phosphate

To glucuronate degradation



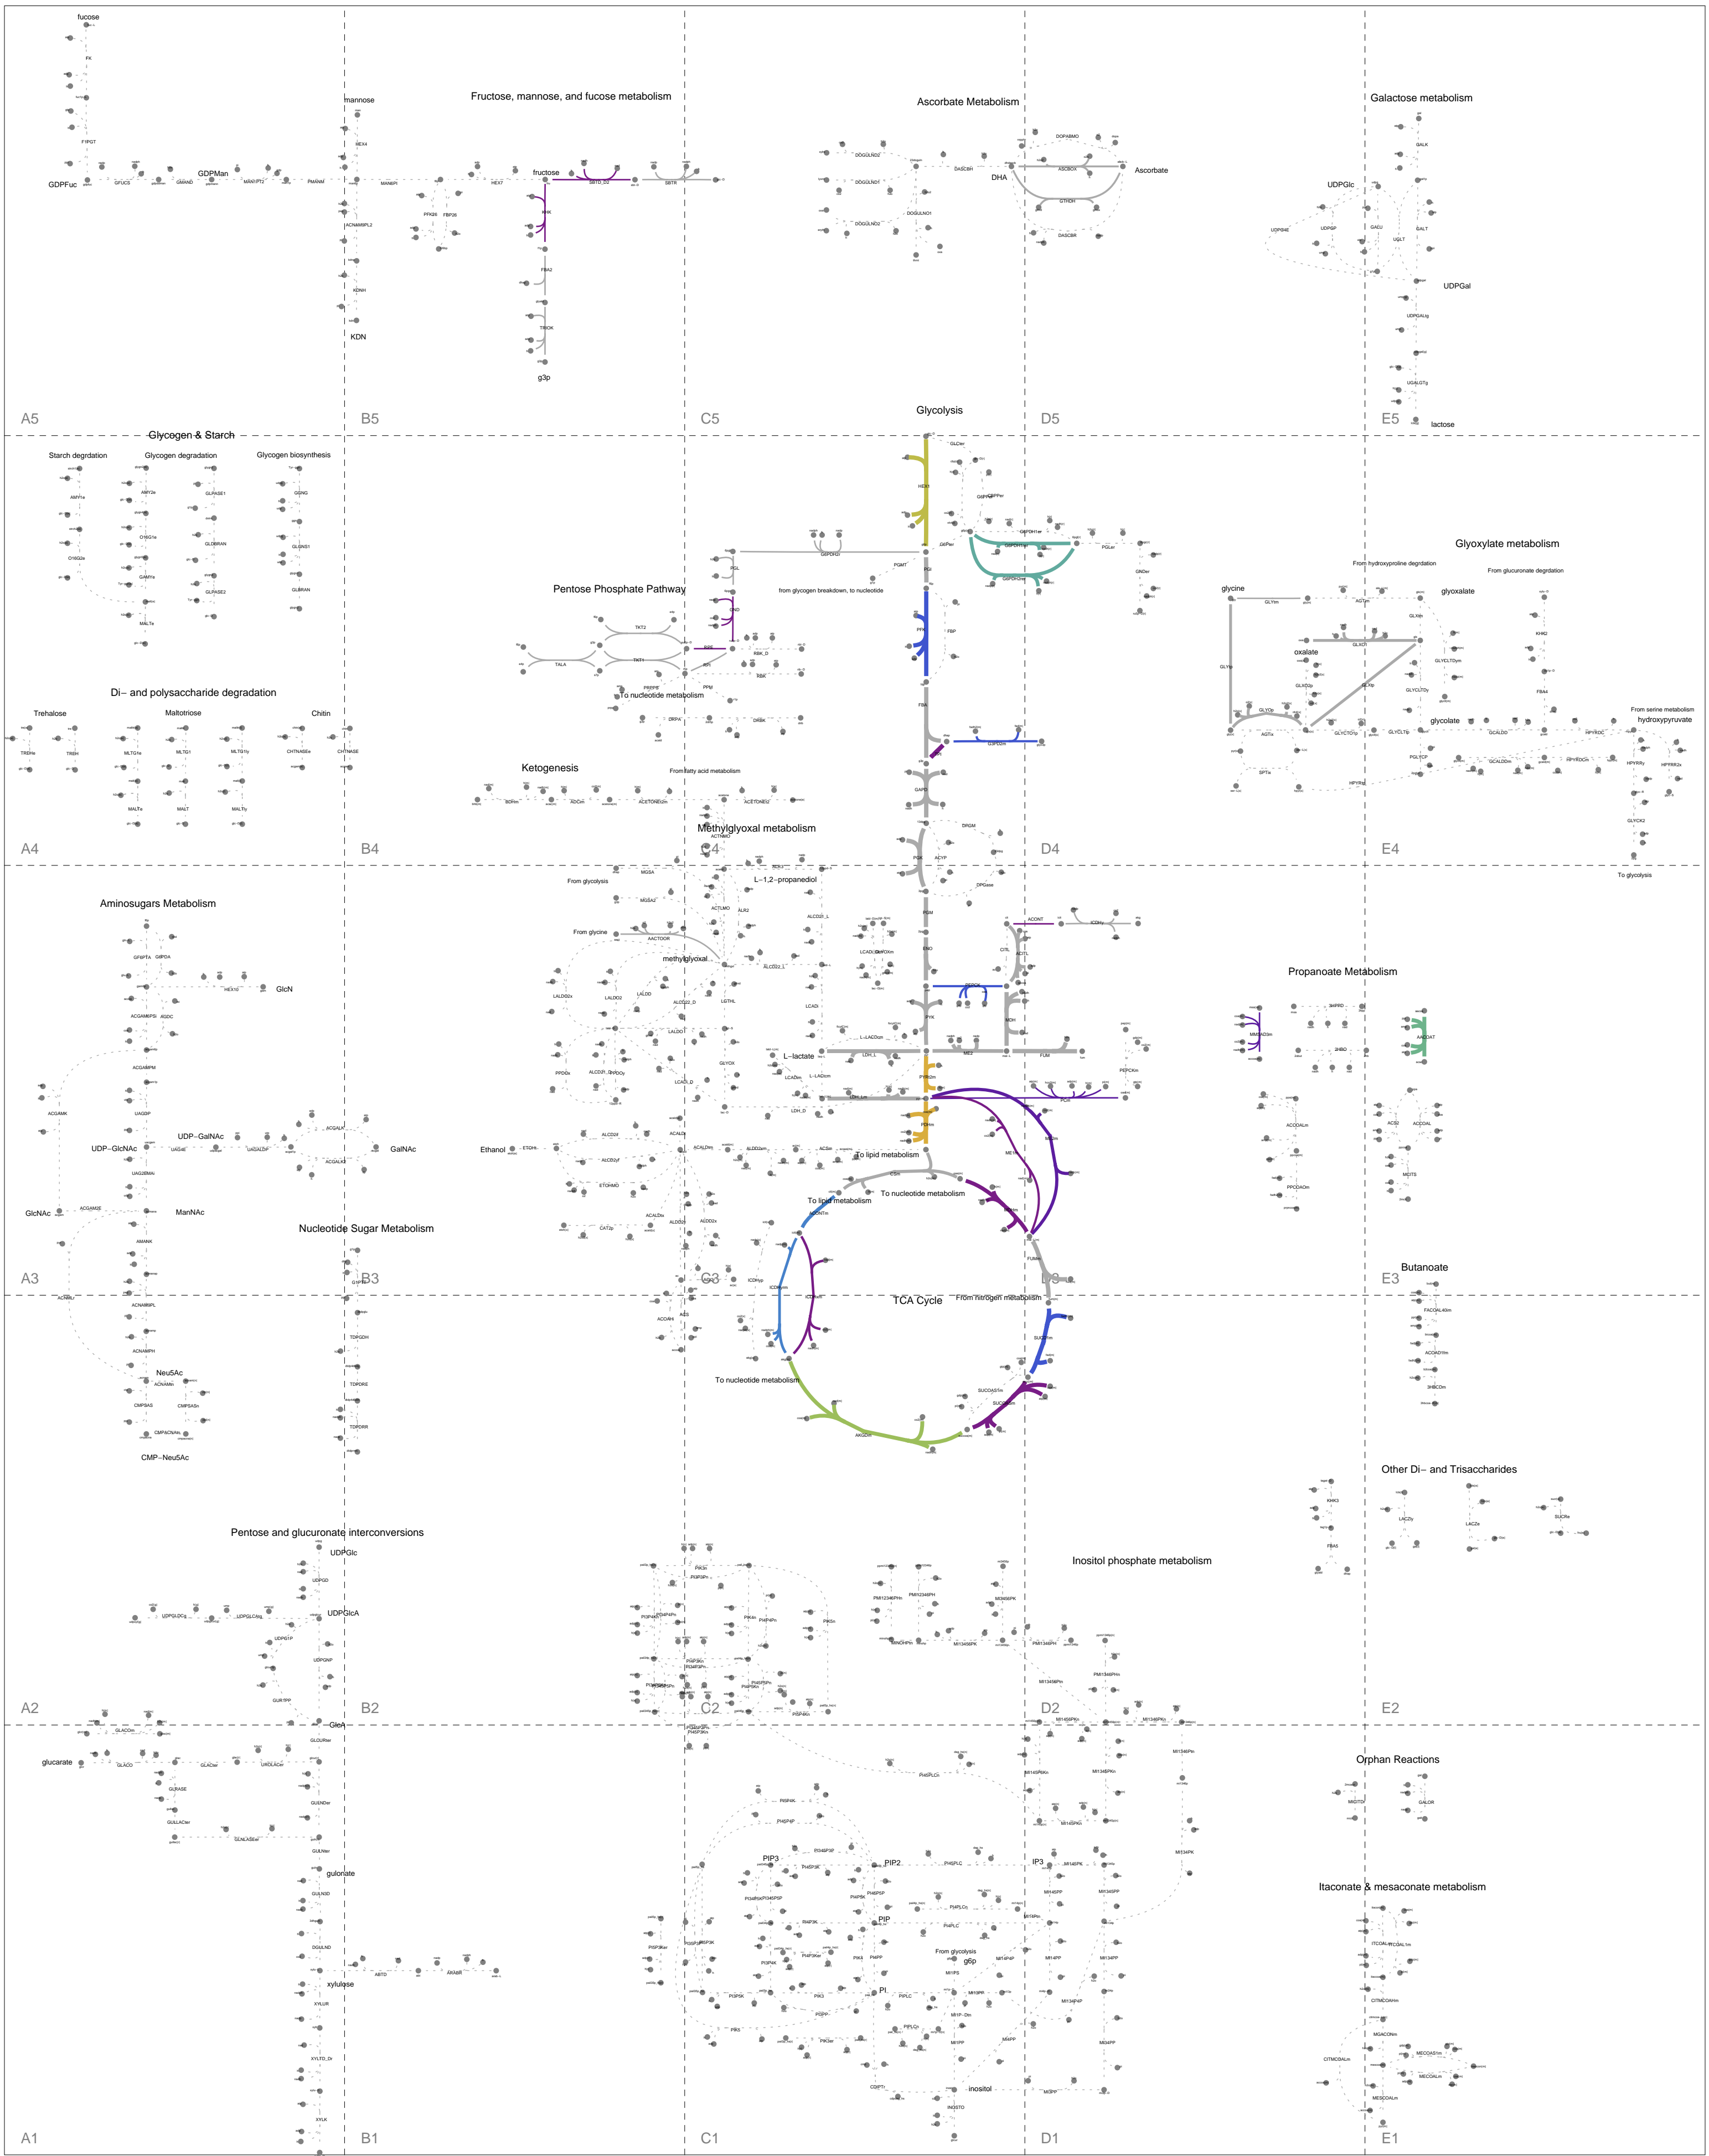

Supplement: 12918_2011_1051_MOESM3_ESM.pdf [file 12918_2011_1051_MOESM3_ESM.pdf]
