# Supplementary material for: A network perspective on metabolic inconsistency
Source: Springer Nature journal article supplement (doi:10.1186/1752-0509-6-41), 2012-01-01

### (a) Gene expression

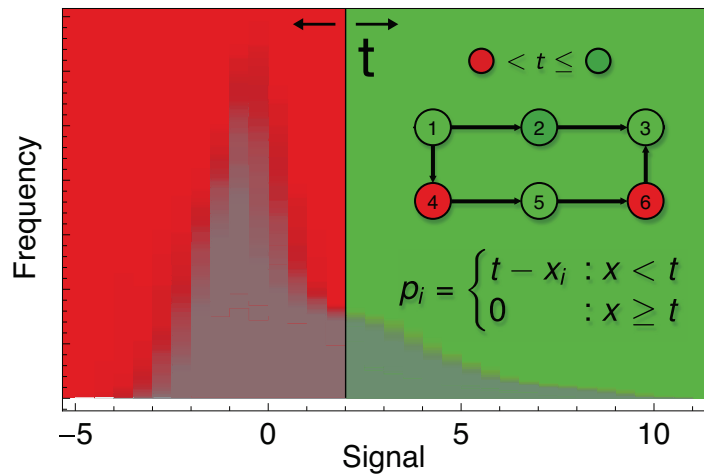

### (b) Metabolic coherence

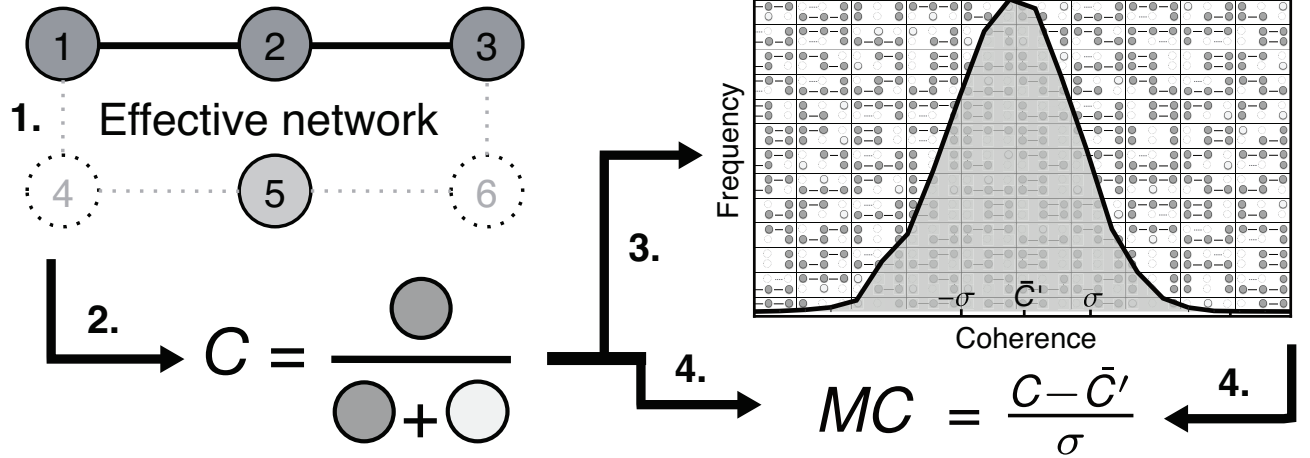

### (c) GIMME

Simultaneous max. of  $v^{obj}$  and min. of  $l$   
(fluxes through unexpressed reactions)

$$\text{Min } l = \sum_{j=1}^n p_j |v_j| \quad \text{GIMME objective}$$

s.t.  $\mathbf{S} \cdot \mathbf{v} = 0$  Steady-state condition

$$\mathbf{v}_{\min} \leq \mathbf{v} \leq \mathbf{v}_{\max} \quad \text{Flux capacities}$$

$$v^{obj} \geq v_{\max}^{obj} \cdot l \quad \text{Metabolic objective}$$

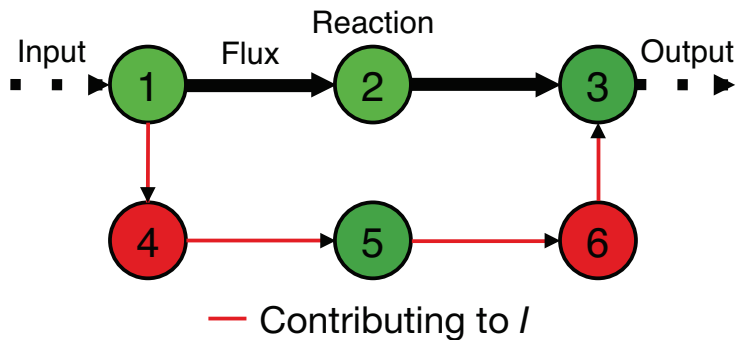

### (d) Comparison

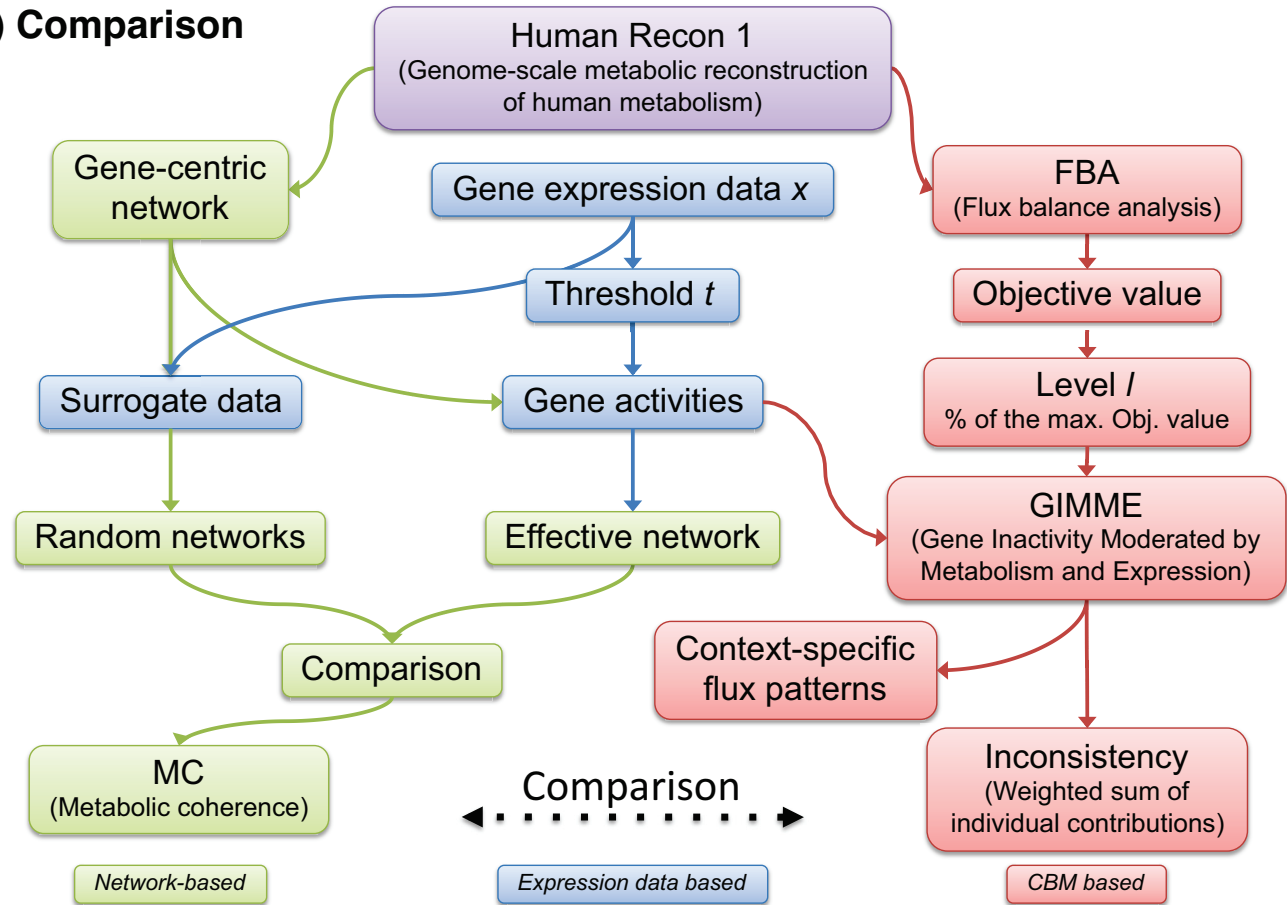

Supplement: 12918_2011_1051_MOESM6_ESM.pdf [file 12918_2011_1051_MOESM6_ESM.pdf]
